# Supplementary material for: Synthesis, Characterization, and Anticancer Activity of Phosphanegold(i) Complexes of 3-Thiosemicarbano-butan-2-one Oxime
Source: MDPI journal article supplement (doi:10.3390/biomedicines11092512), 2023-09-12
Supplement: s1 [file s1]

# Synthesis, Characterization, and Anticancer Activity of Phosphanegold(i) Complexes of 3-Thiosemicarbano-butan-2-one Oxime

Sani A. Zarewa <sup>1,†</sup>, Lama Binobaid <sup>2,†</sup>, Adam A. A. Sulaiman <sup>1,3,\*</sup>, Homood M. As Sobeai <sup>2</sup>, Moureq Alotaibi <sup>2</sup>, Ali Alhoshani <sup>2</sup> and Anvarhusein A. Isab <sup>1,4,\*</sup>

<sup>1</sup> Department of Chemistry, King Fahd University of Petroleum and Minerals, Dhahran 31261, Saudi Arabia; g202101570@kfupm.edu.sa

<sup>2</sup> Department of Pharmacology and Toxicology, College of Pharmacy, King Saud University, Riyadh 11451, Saudi Arabia; 442202864@student.ksu.edu.sa (L.B.); hassobeai@ksu.edu.sa (H.M.A.S.); mralotaibi@ksu.edu.sa (M.A.); ahoshani@ksu.edu.sa (A.A.)

<sup>3</sup> Core Research Facilities (CRF), King Fahd University of Petroleum and Minerals, Dhahran 31261, Saudi Arabia

<sup>4</sup> Interdisciplinary Research Center for Advanced Materials, King Fahd University of Petroleum and Minerals, Dhahran 31261, Saudi Arabia

\* Correspondence: adamahmed@kfupm.edu.sa (A.A.A.S.); aisab@kfupm.edu.sa (A.A.I.)

† These authors contributed equally to this work.

**Citation:** Zarewa, S.A.; Binobaid, L.; Sulaiman, A.A.A.; Sobeai, H.M.A.; Alotaibi, M.; Alhoshani, A.; Isab, A.A. Synthesis, Characterization, and Anticancer Activity of Phosphanegold(i) Complexes of 3-thiosemicarbano-butan-2-one Oxime. *Biomedicines* **2023**, *11*, x. <https://doi.org/10.3390/xxxxx>

Academic Editor: Zhi Shi

Received: 22 July 2023

Revised: 23 August 2023

Accepted: 4 September 2023

Published: 12 September 2023

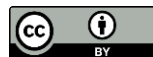

**Copyright:** © 2023 by the authors. Submitted for possible open access publication under the terms and conditions of the Creative Commons Attribution (CC BY) license (<https://creativecommons.org/licenses/by/4.0/>).

## TABLE OF CONTENTS

|                             |                |
|-----------------------------|----------------|
| Supporting Table.....       | Table S1-S3    |
| FT-IR spectra data .....    | Figure S1-S5   |
| NMR spectra data .....      | Figure S6-S19  |
| Supplementary figures ..... | Figure S20-S21 |

**Table S1:** CHNS analysis of ligand and gold(I) complexes **1-4**

| Complex                                                                                                                                  | Found (Calculated) % |            |              |              |
|------------------------------------------------------------------------------------------------------------------------------------------|----------------------|------------|--------------|--------------|
|                                                                                                                                          | %C                   | % H        | %N           | %S           |
| C <sub>5</sub> H <sub>10</sub> N <sub>4</sub> SO (Ligand) ( <b>TBO</b> )                                                                 | 34.75(34.47)         | 5.39(5.79) | 31.50(32.16) | 18.22(18.40) |
| [(CH <sub>3</sub> ) <sub>3</sub> PAu(I)(C <sub>5</sub> H <sub>10</sub> N <sub>4</sub> SO)].PF <sub>6</sub> ( <b>1</b> )                  | 15.79(16.22)         | 2.97(3.23) | 9.02(9.46)   | 5.14(5.41)   |
| [(CH <sub>3</sub> CH <sub>2</sub> ) <sub>3</sub> PAu(I)(C <sub>5</sub> H <sub>10</sub> N <sub>4</sub> SO)].PF <sub>6</sub> ( <b>2</b> )  | 20.77(20.83)         | 3.85(3.97) | 9.06(8.83)   | 5.13(5.06)   |
| [[C(CH <sub>3</sub> ) <sub>3</sub> ] <sub>3</sub> PAu(I)(C <sub>5</sub> H <sub>10</sub> N <sub>4</sub> SO)].PF <sub>6</sub> ( <b>3</b> ) | 28.81(28.42)         | 4.91(5.19) | 7.96(7.80)   | 4.85(4.46)   |
| [(Ph) <sub>3</sub> PAu(I)(C <sub>5</sub> H <sub>10</sub> N <sub>4</sub> SO)].PF <sub>6</sub> ( <b>4</b> )                                | 35.37(35.49)         | 3.02(3.24) | 7.16(7.20)   | 3.96(4.12)   |

**Table S2.** Mid FT-IR wavenumbers (cm<sup>-1</sup>) of ligand and gold(I) complexes (**1-4**)

| <b>Compound</b>    | $\nu(\text{OH})$ | $\nu(\text{NH}_2)$ | $\nu(\text{NH})$ | $\nu(\text{C=N-OH})$ | $\nu(\text{C=N})$ | $\nu(-\text{N-C=S})$ |
|--------------------|------------------|--------------------|------------------|----------------------|-------------------|----------------------|
| <b>Ligand(TBO)</b> | 3415             | 3264,3238          | 3156             | 1598                 | 1494              | 1374, 1286, 845      |
| <b>1</b>           | 3427             | 3248, 3222         | 3165             | 1605                 | 1507              | 1365, 1294, 845      |
| <b>2</b>           | 3429             | 3247, 3220         | 3165             | 1607                 | 1508              | 1367, 1297, 842      |
| <b>3</b>           | 3429             | 3248, 3220         | 3165             | 1607                 | 1508              | 1370, 1297, 838      |
| <b>4</b>           | 3428             | 3246, 3221         | 3158             | 1605                 | 1507              | 1367, 1295, 841      |

**Table S3:**  $^{31}\text{P}$  NMR chemical shifts of phosphanegold(I) precursors and their complexes with TBO ligand in DMSO.

| Compound                                                                                                            | $^{31}\text{P}$ | $\delta_{\text{shift}}$ | $\text{PF}_6^-$ |
|---------------------------------------------------------------------------------------------------------------------|-----------------|-------------------------|-----------------|
| $(\text{CH}_3)_3\text{PAuCl}$                                                                                       | -9.662          |                         |                 |
| $[(\text{CH}_3)_3\text{PAu(I)}(\text{C}_5\text{H}_{10}\text{N}_4\text{SO})]\text{PF}_6$ ( <b>1</b> )                | 0.089           | 9.751                   | -143.591        |
| $[(\text{CH}_3\text{CH}_2)_3\text{PAuCl}$                                                                           | 32.077          |                         |                 |
| $[(\text{CH}_3\text{CH}_2)_3\text{PAu(I)}(\text{C}_5\text{H}_{10}\text{N}_4\text{SO})]\text{PF}_6$ ( <b>2</b> )     | 36.899          | 4.822                   | -143.591        |
| $[\text{C}(\text{CH}_3)_3]\text{PAuCl}$                                                                             | 91.155          |                         |                 |
| $[\{\text{C}(\text{CH}_3)_3\}_3\text{PAu(I)}(\text{C}_5\text{H}_{10}\text{N}_4\text{SO})].\text{PF}_6$ ( <b>3</b> ) | 97.021          | 5.866                   |                 |
| $\text{Ph}_3\text{PAu(I)Cl}$                                                                                        | 33.818          |                         |                 |
| $[\text{Ph}_3\text{PAu(I)}(\text{C}_5\text{H}_{10}\text{N}_4\text{SO})].\text{PF}_6$ ( <b>4</b> )                   | 36.792          | 2.974                   | -143.591        |

## FT-IR spectra data

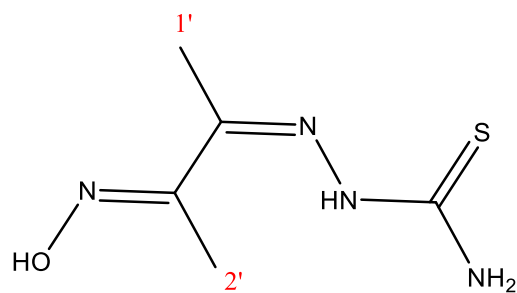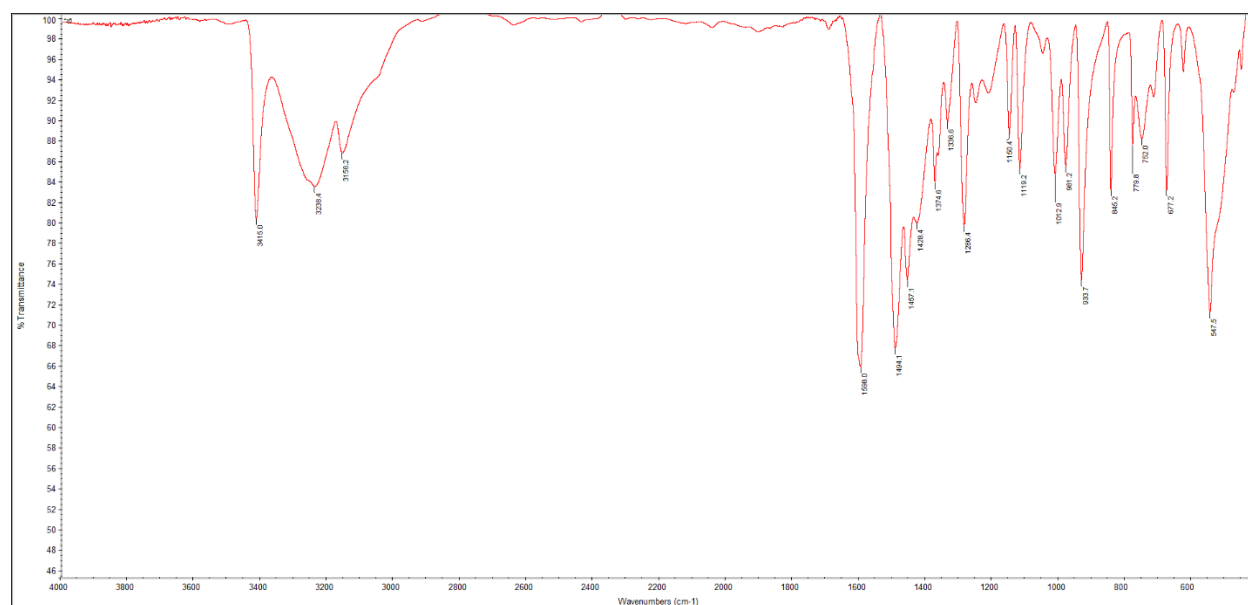

**Figure S1:** IR spectra of Ligand (TBO)

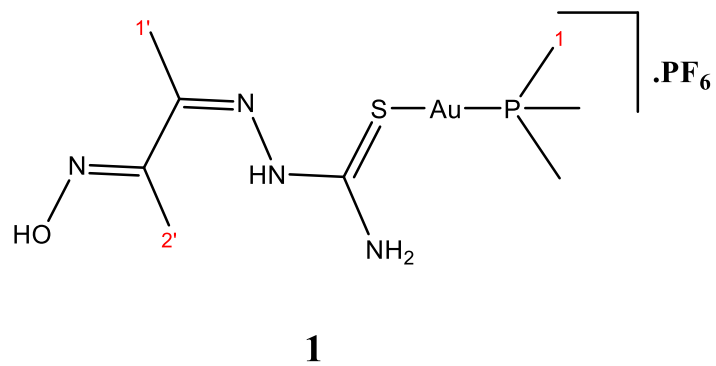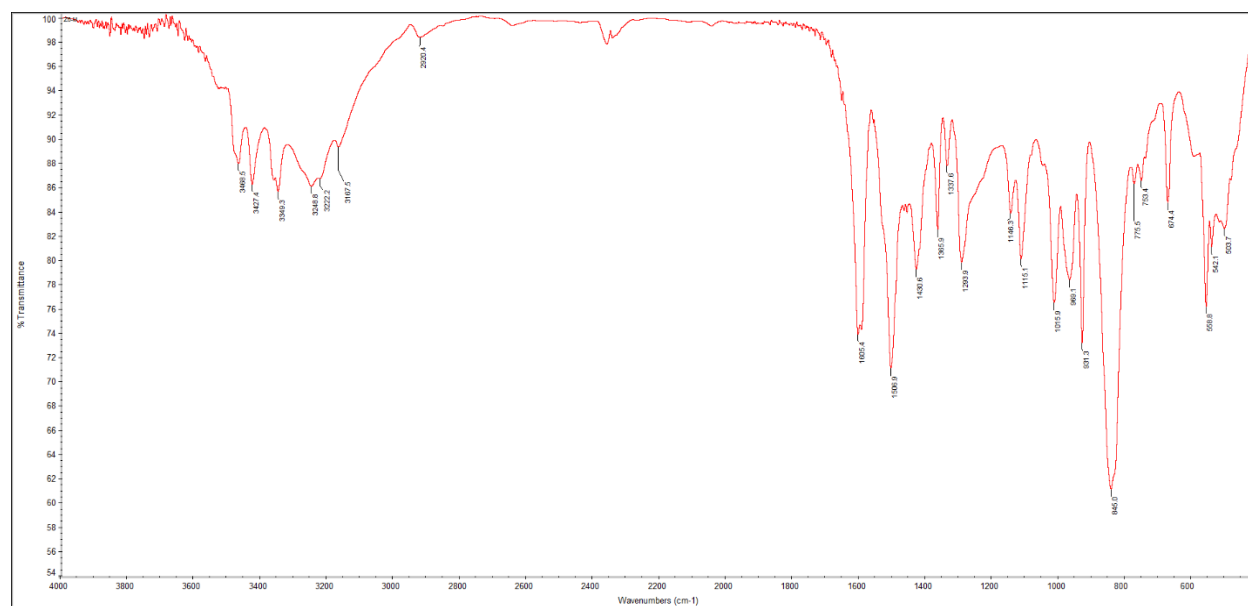

**Figure S2:** IR spectra of complex **1**

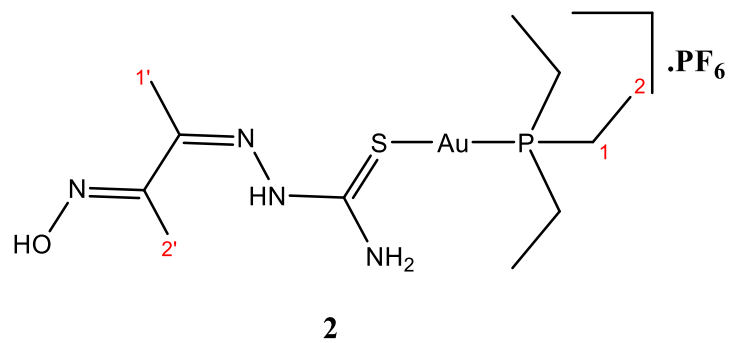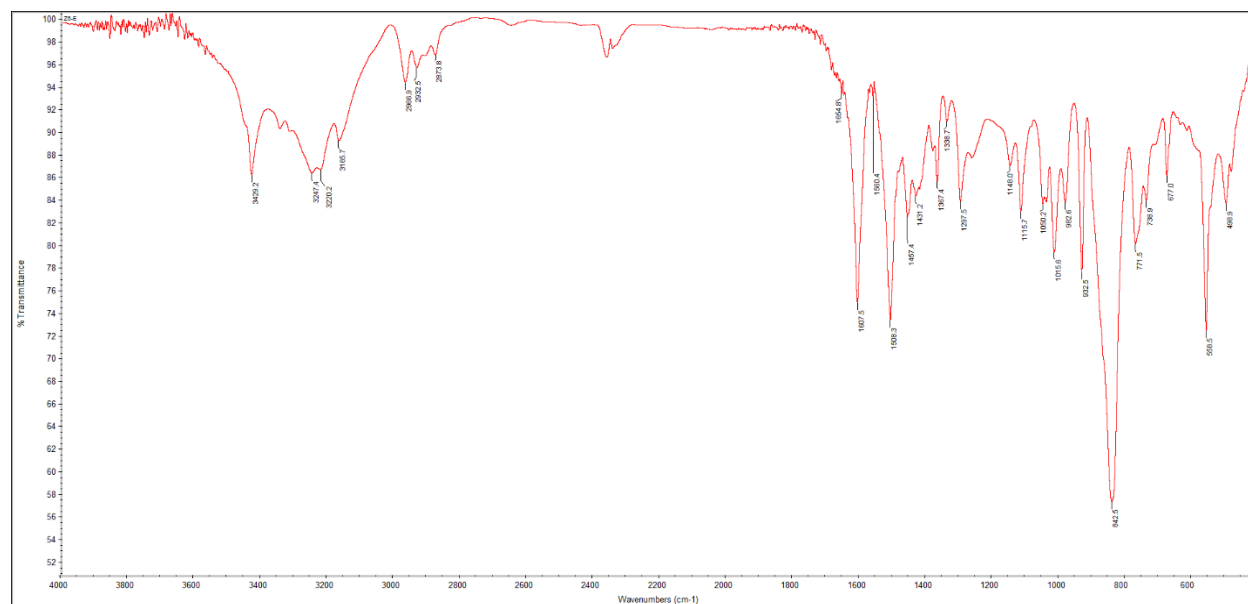

**Figure S3:** IR spectra of complex **2**



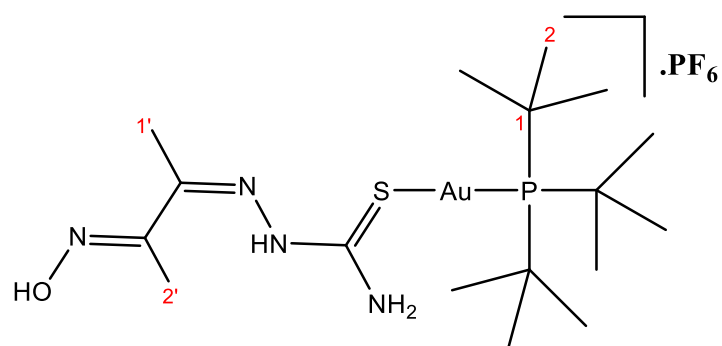

3

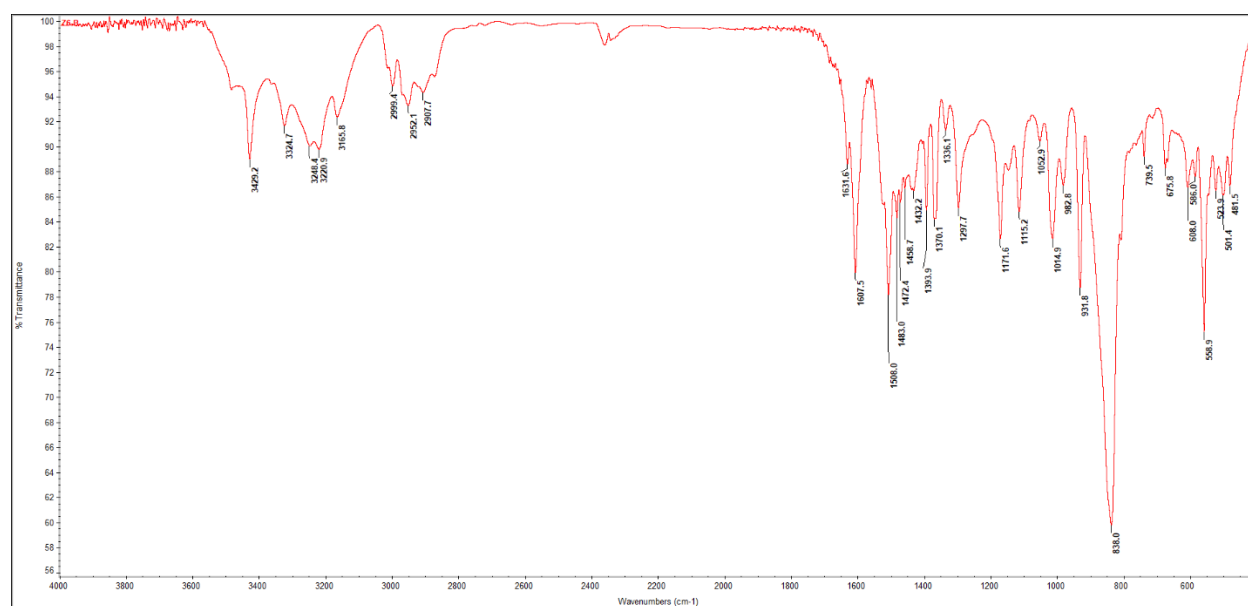

Figure S4: IR spectra of complex 3

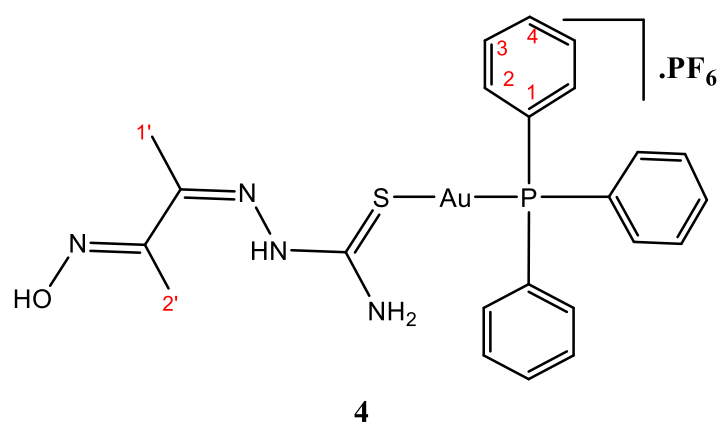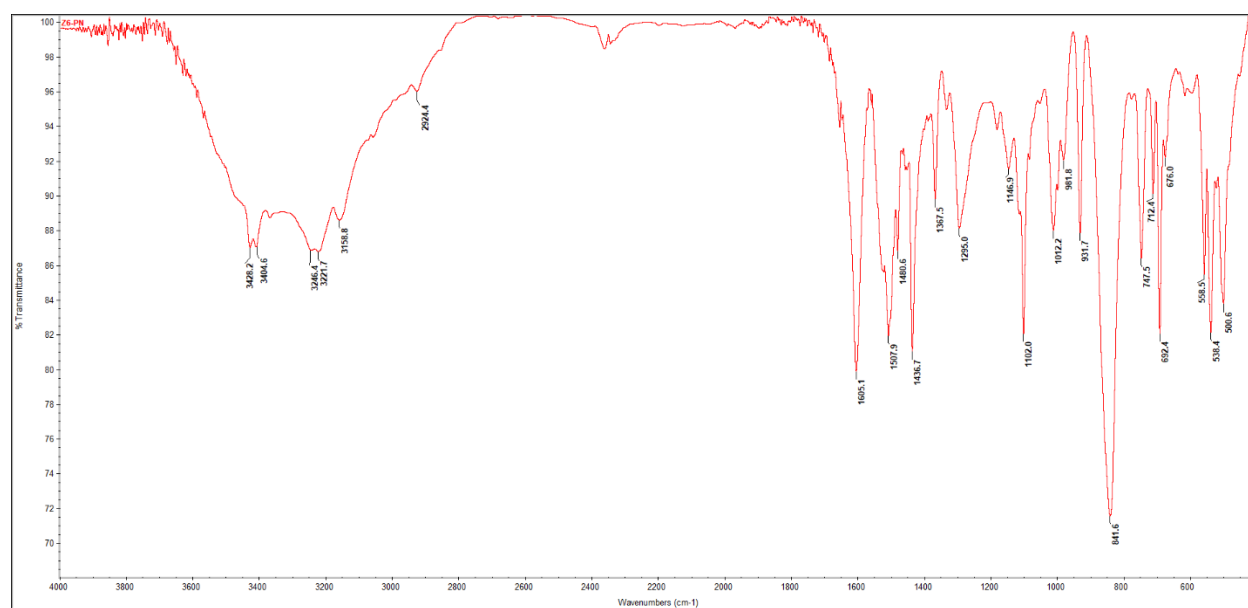

**Figure S5:** IR spectra of complex **4**

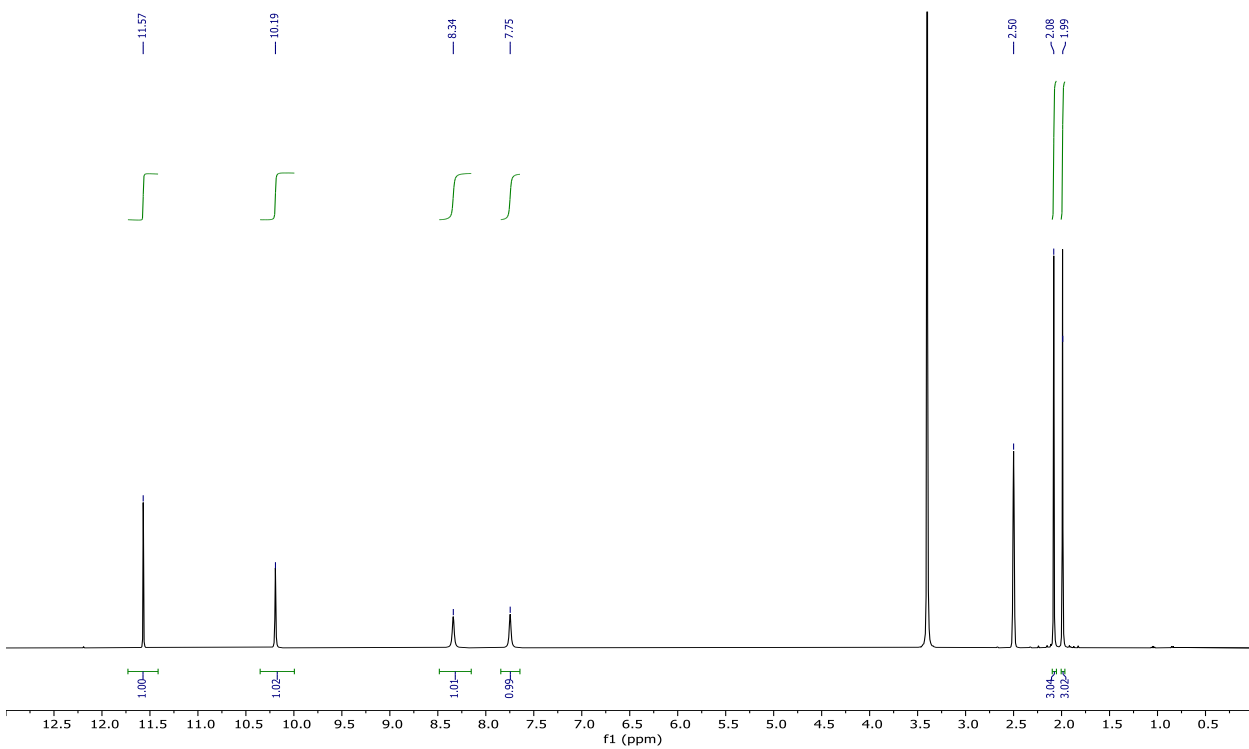

**Figure S6:**  $^1\text{H}$  NMR spectrum of Ligand (TBO) in DMSO- $\text{d}_6$

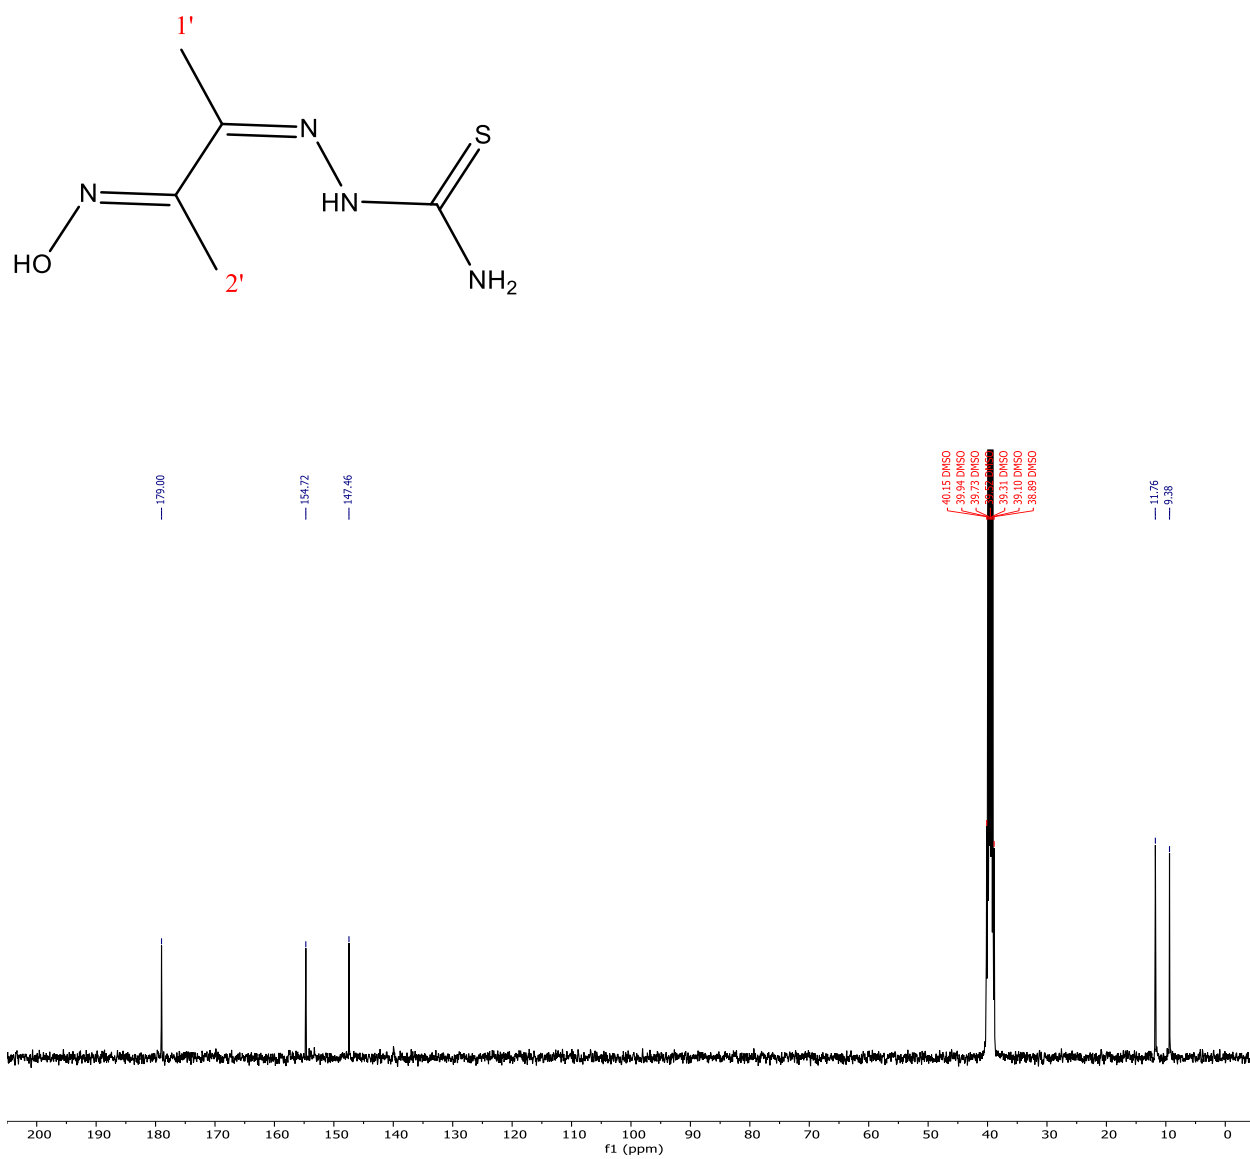

**Figure S7:**  $^{13}\text{C}$  NMR spectrum of Ligand (TBO) in DMSO-d<sub>6</sub>.

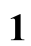

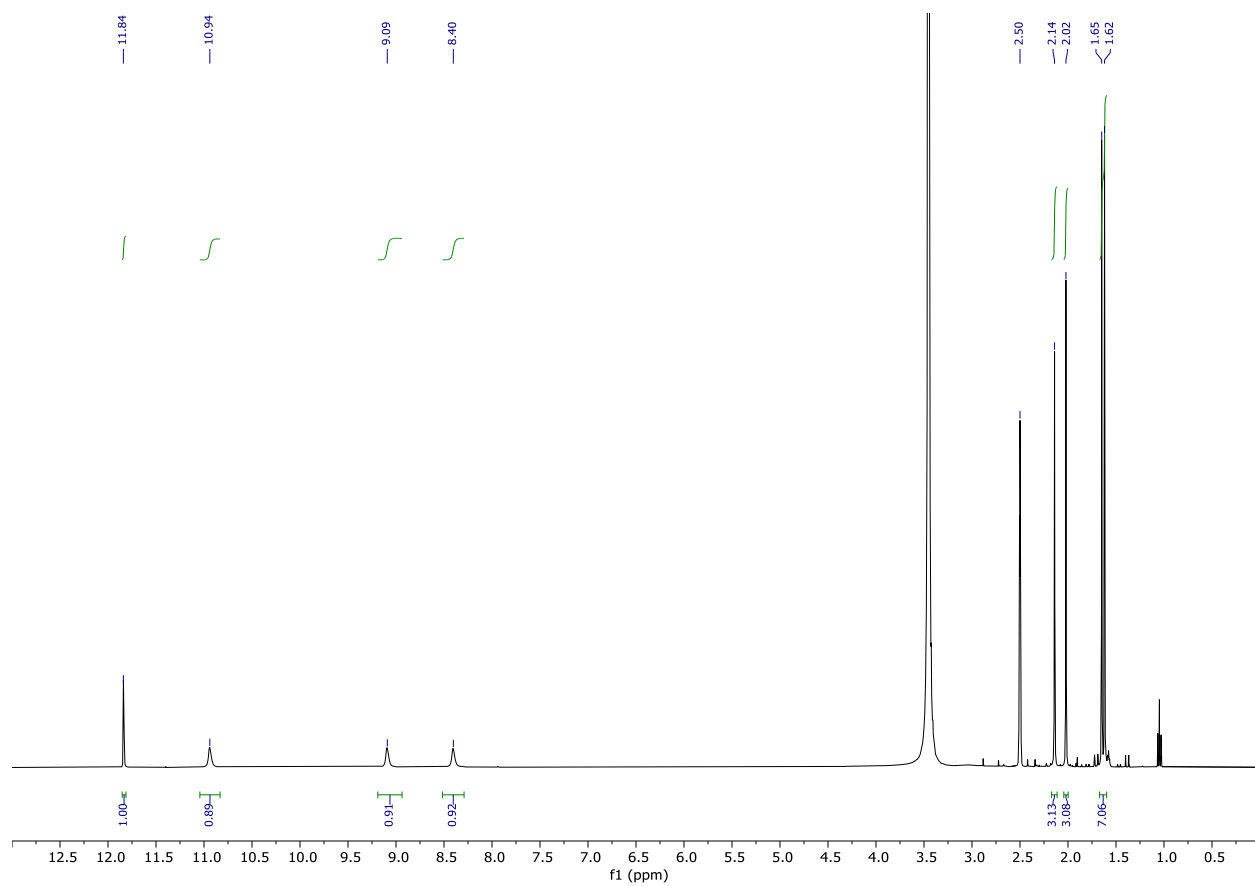

**Figure S8:** <sup>1</sup>H NMR spectrum of Complex **1** in DMSO-d<sub>6</sub>.

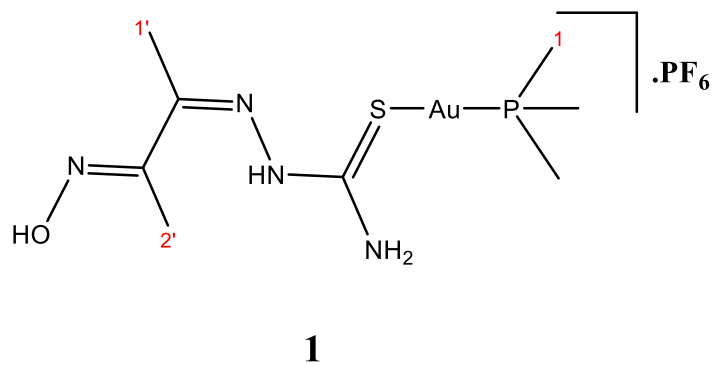

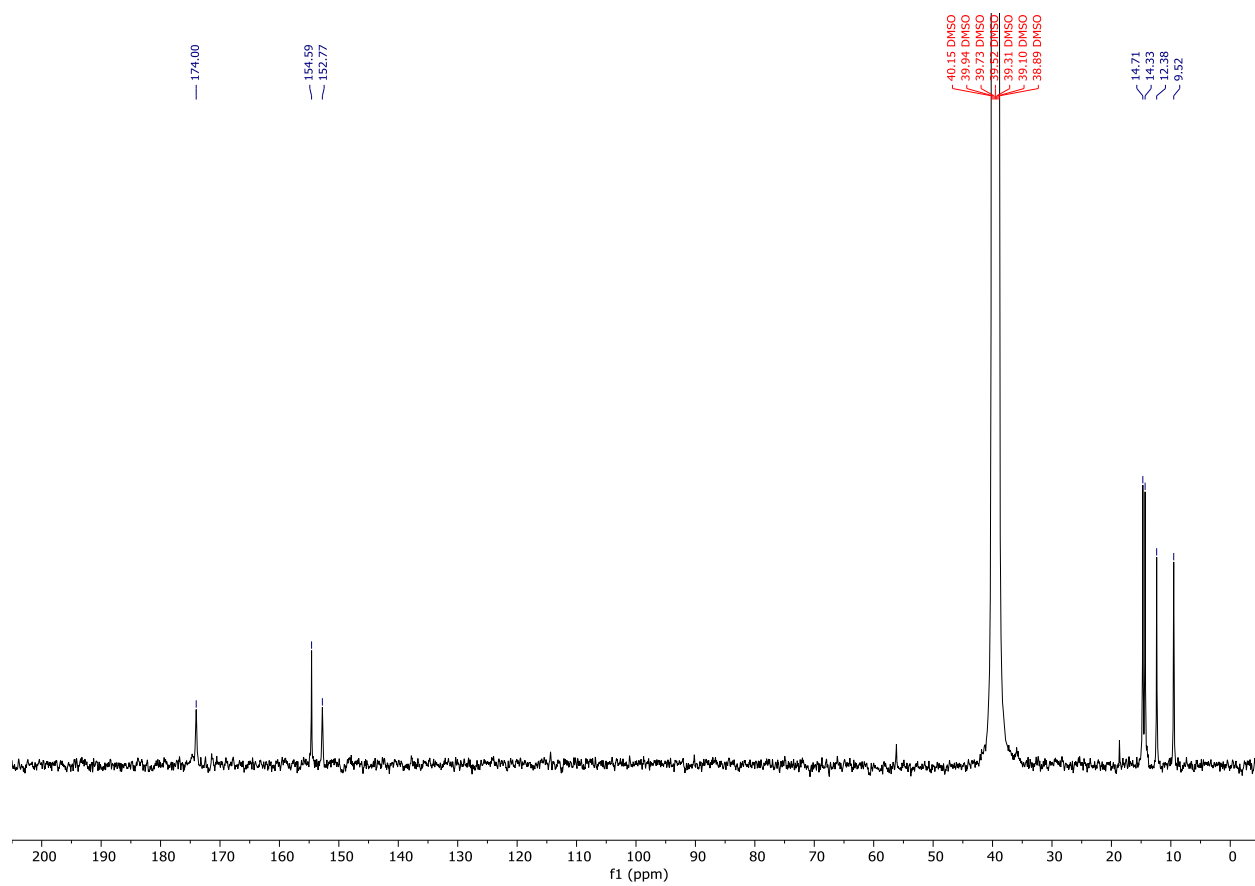

**Figure S9:**  $^{13}\text{C}$  NMR spectrum of Complex **1** in DMSO- $d_6$ .

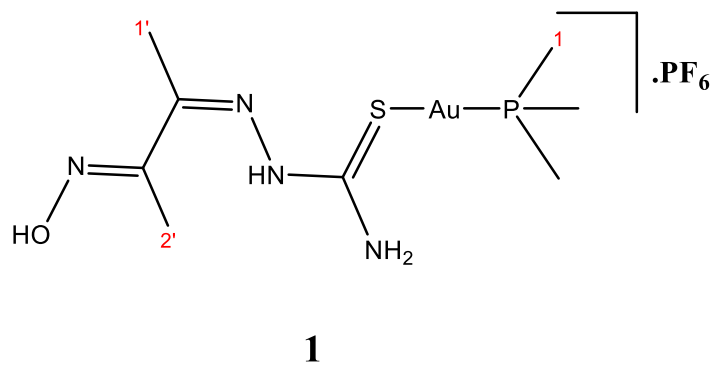

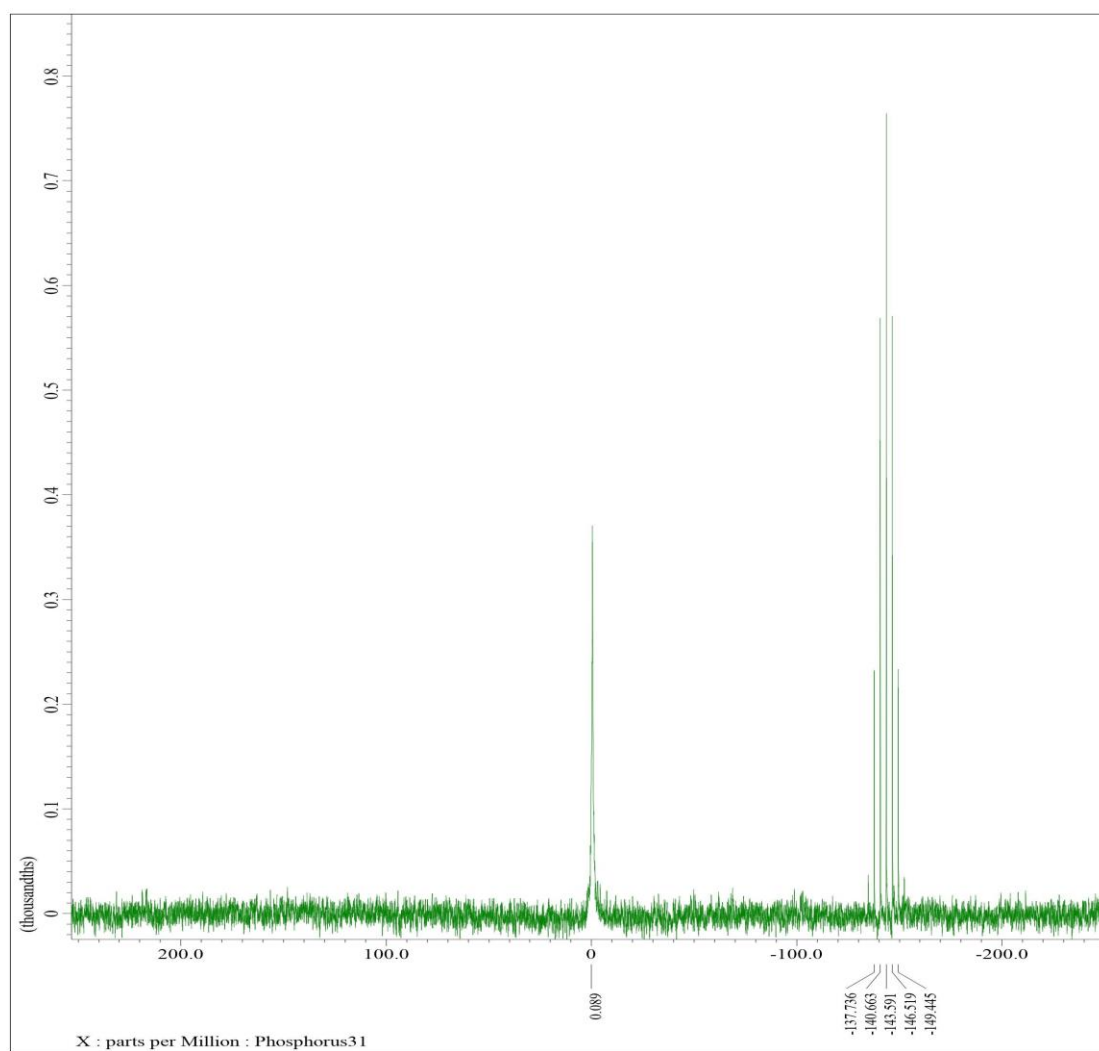

**Figure S10:**  $^{31}\text{P}$  NMR spectrum of complex **1** in DMSO- $\text{d}_6$ .



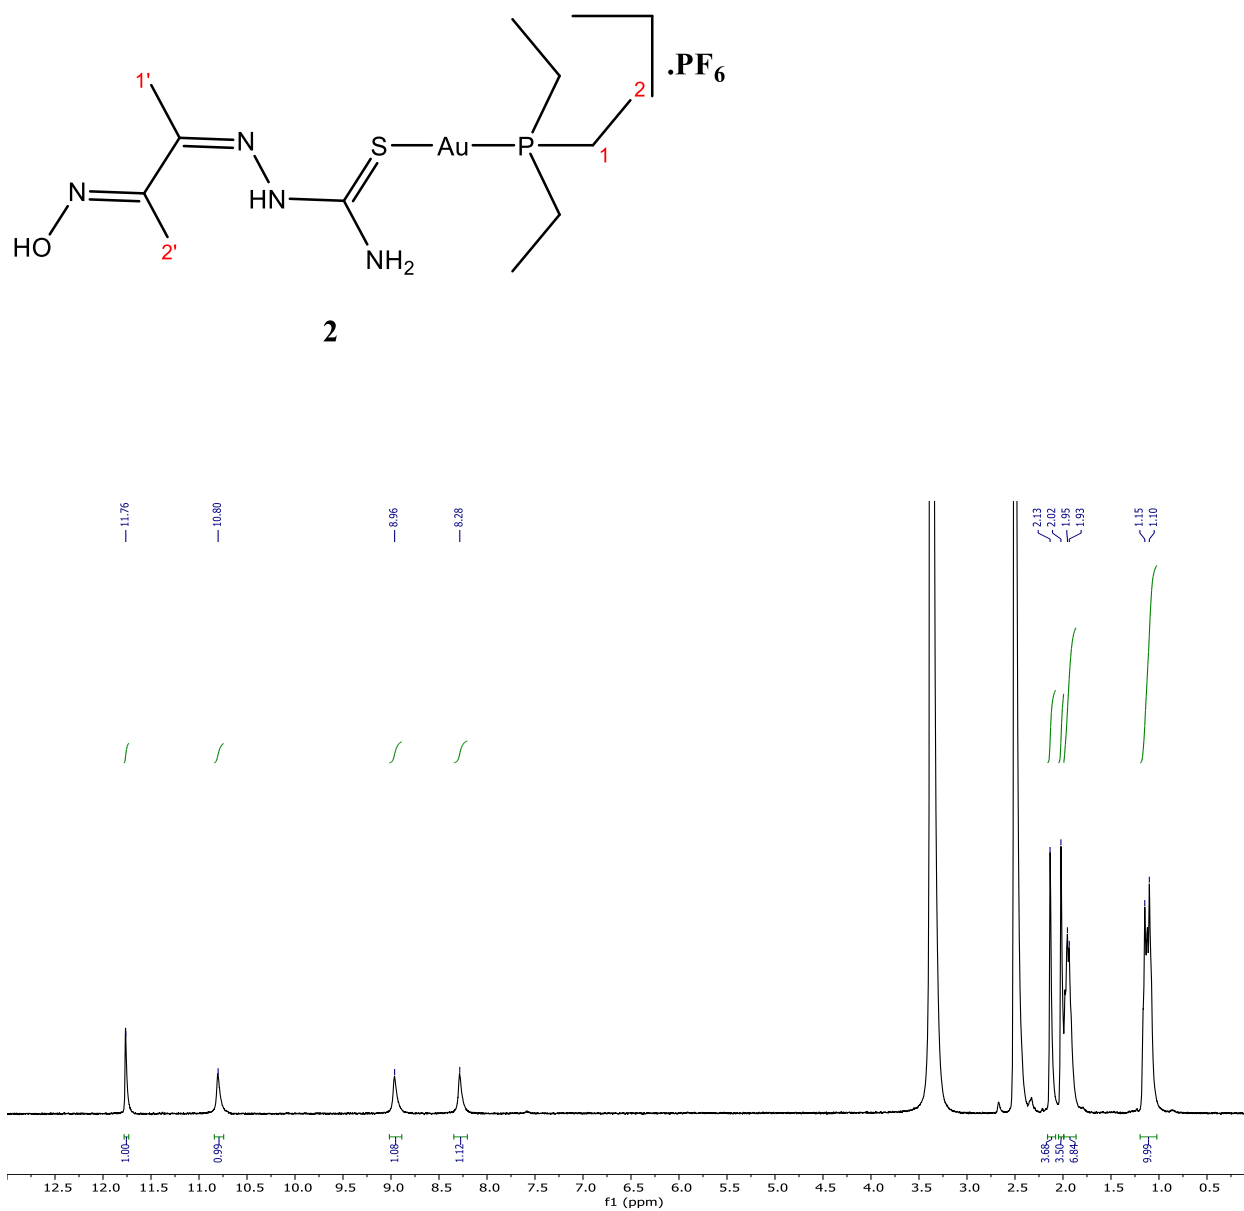

**Figure S11:**  $^1\text{H}$  NMR spectrum of Complex 2 in DMSO- $d_6$ .

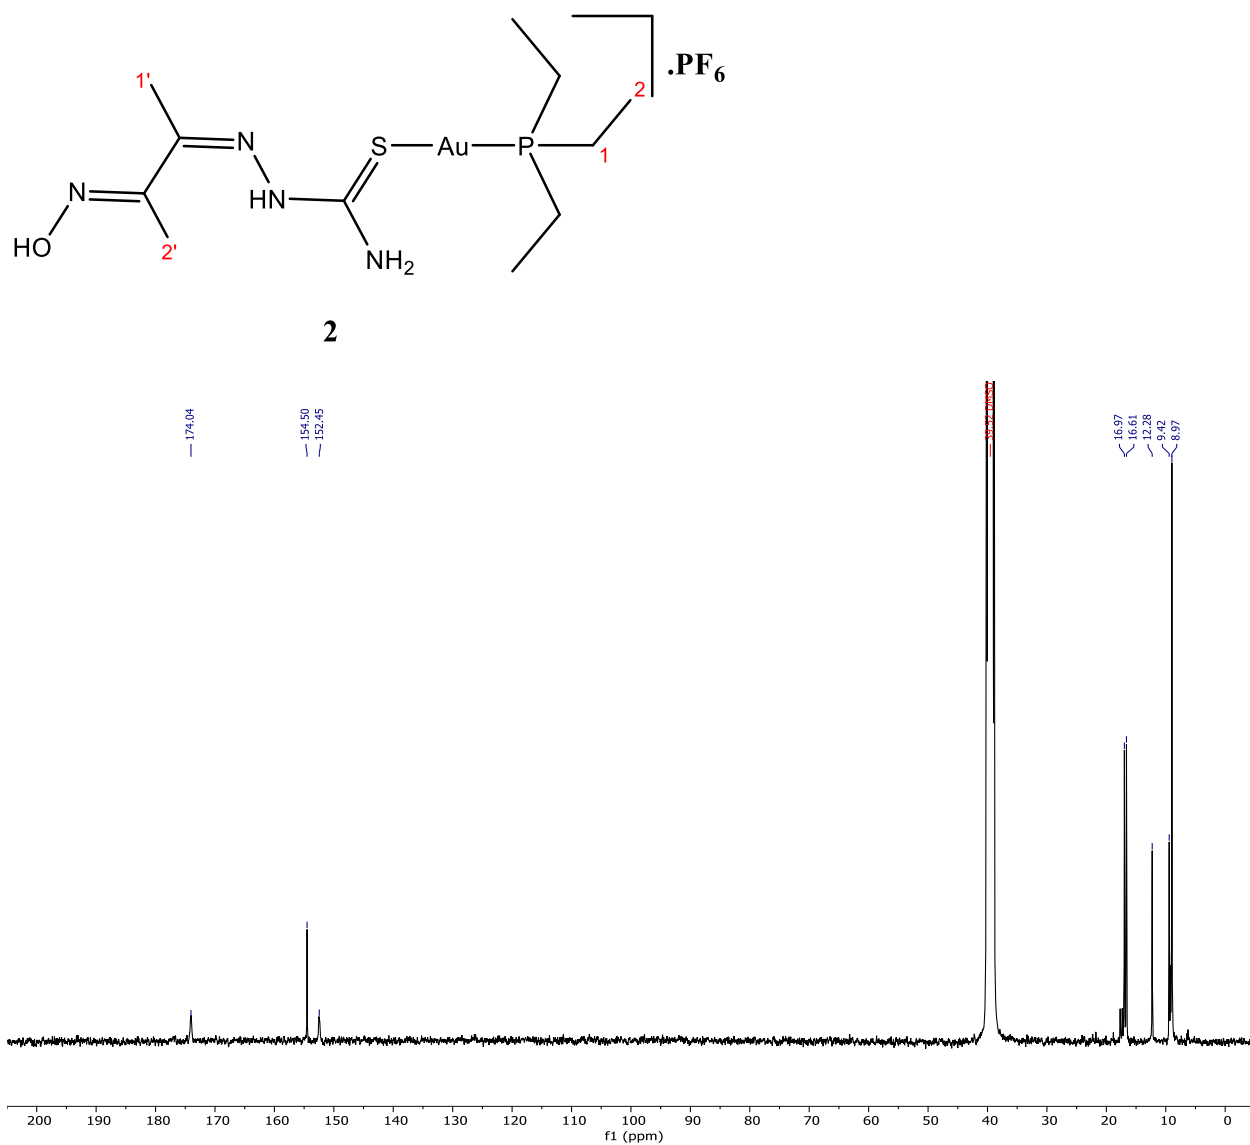

**Figure S12:**  $^{13}\text{C}$  NMR spectrum of Complex 2 in  $\text{DMSO-d}_6$ .

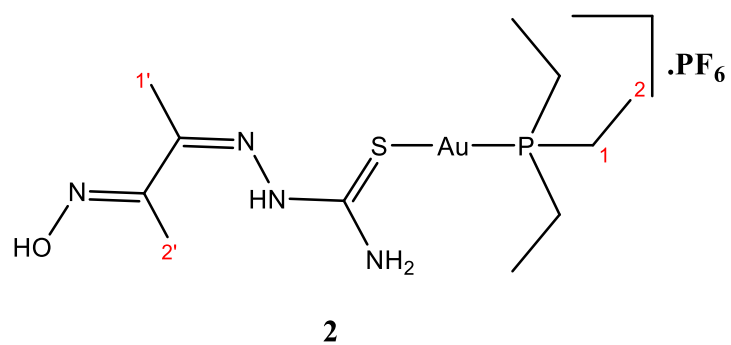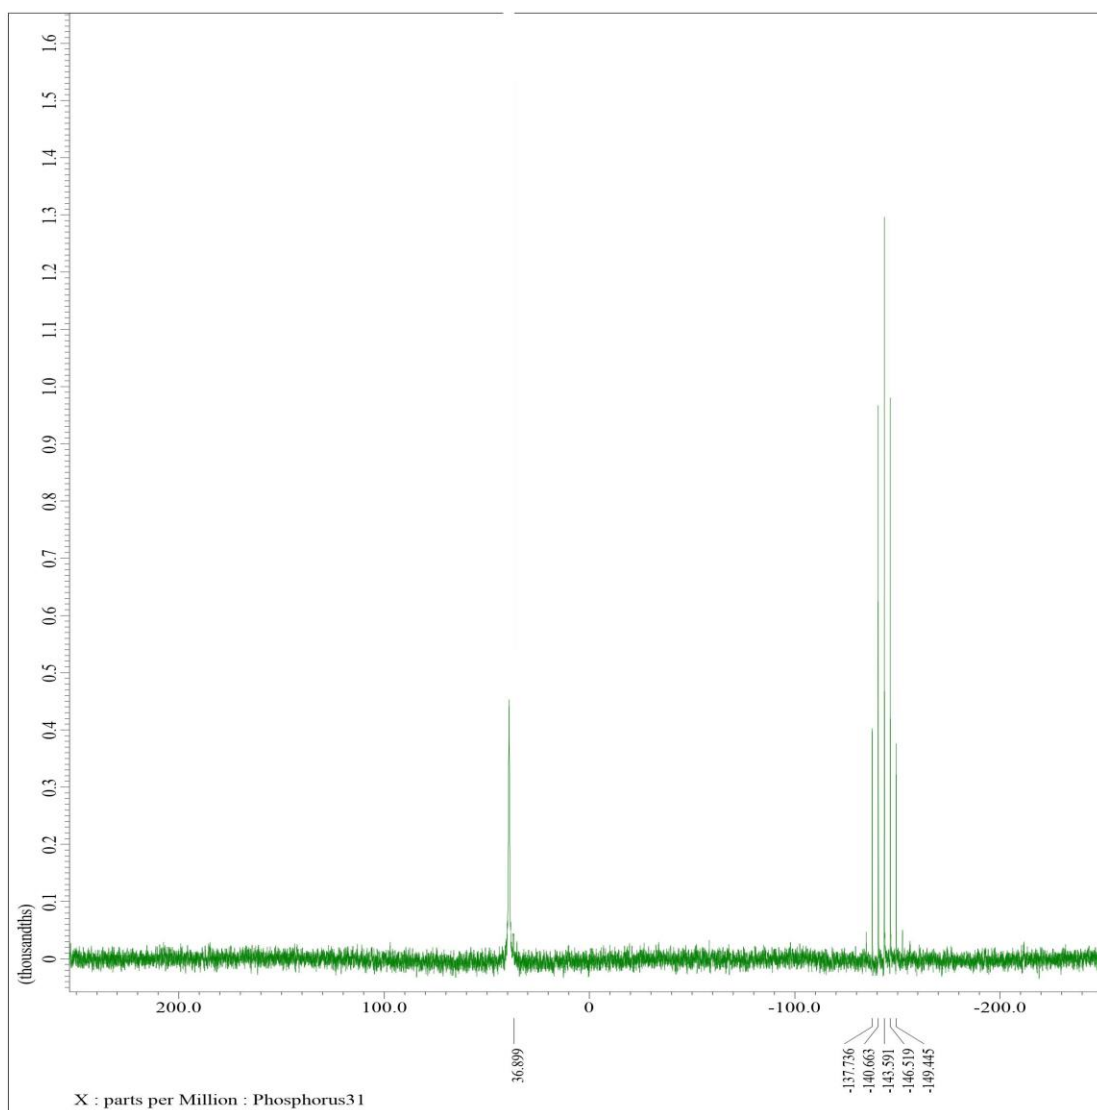

**Figure S13:** <sup>31</sup>P NMR spectrum of complex **2** in DMSO-d<sub>6</sub>.

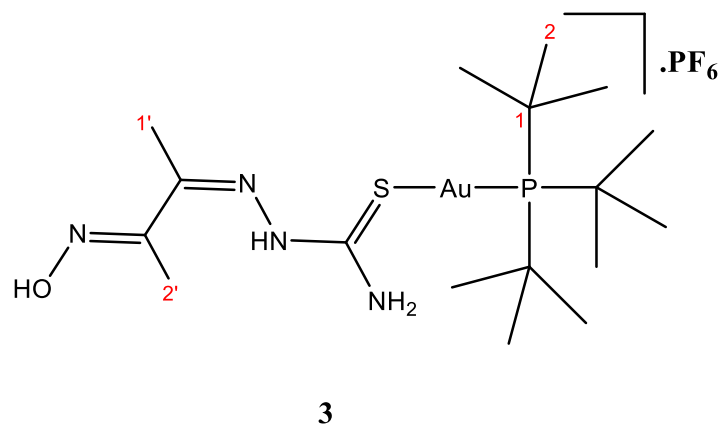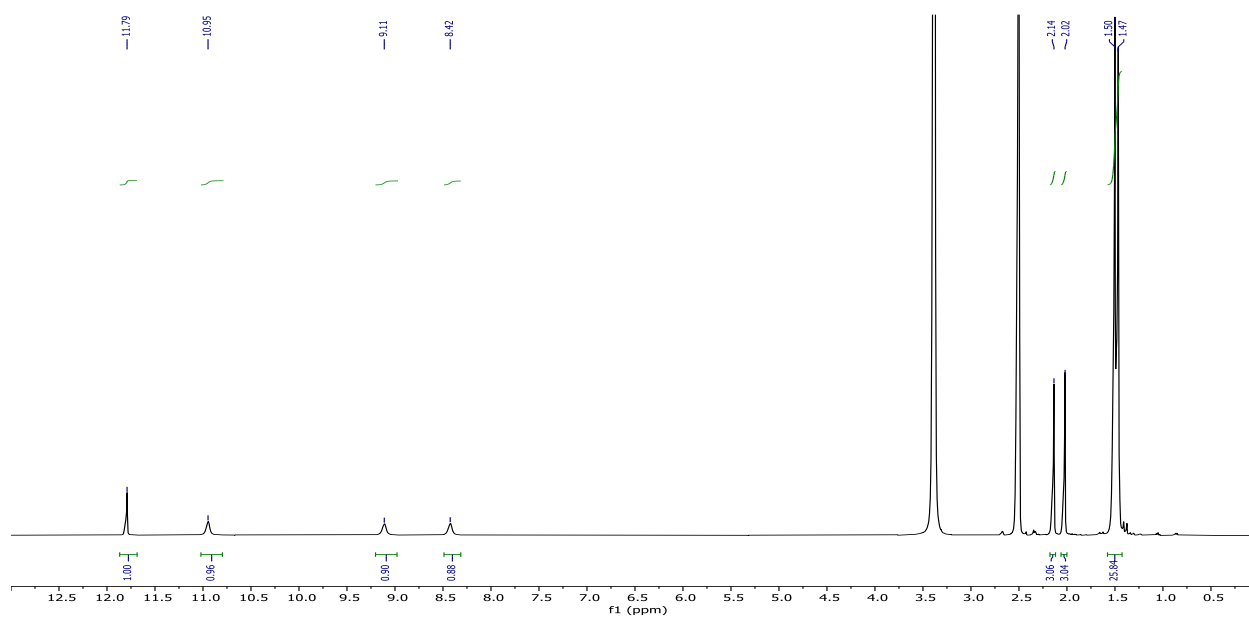

**Figure S14:**  $^1\text{H}$  NMR spectrum of Complex 3 in  $\text{DMSO-d}_6$ .

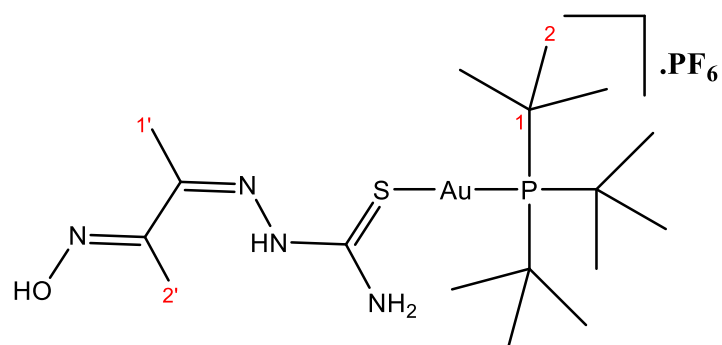

**3**

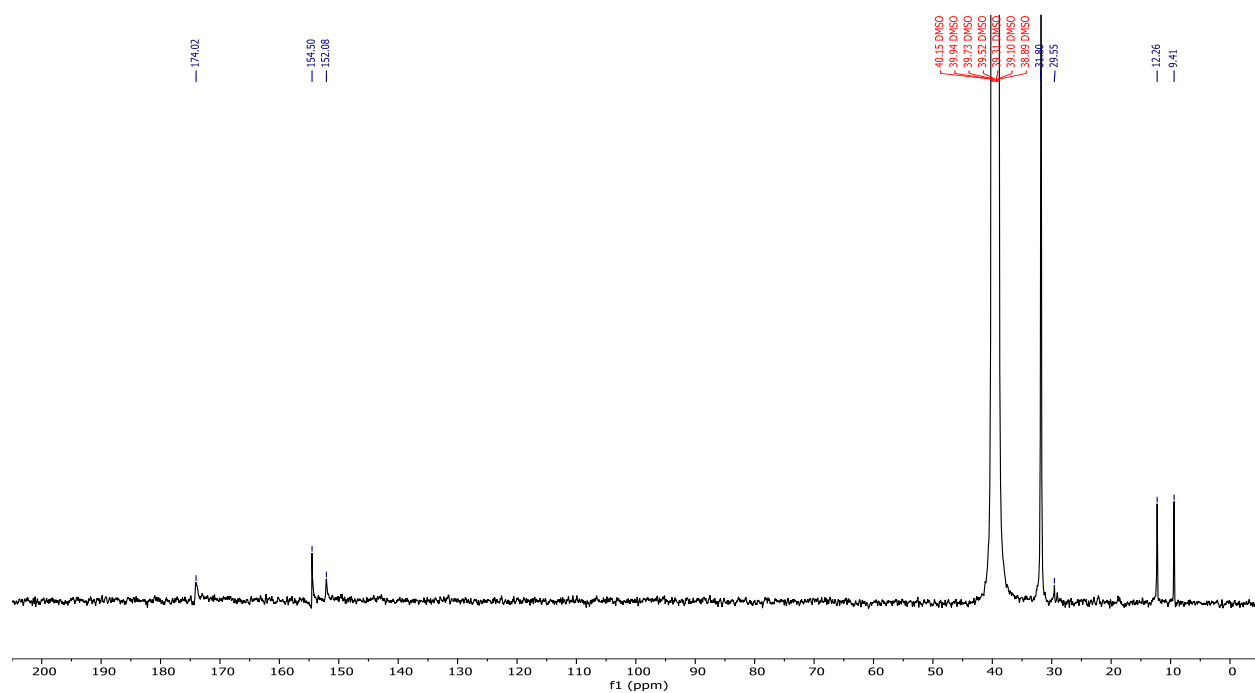

**Figure S15:** <sup>13</sup>C NMR spectrum of Complex **3** in DMSO-d<sub>6</sub>.

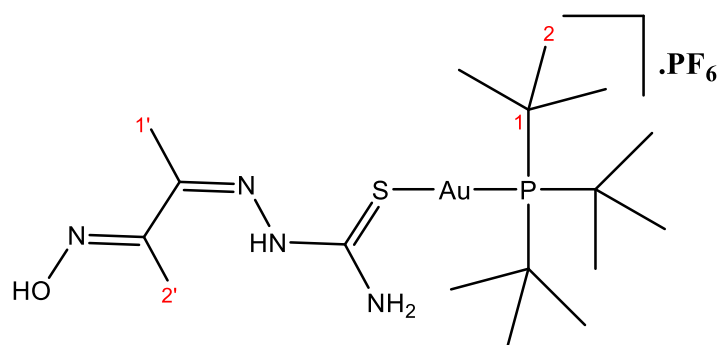

**3**

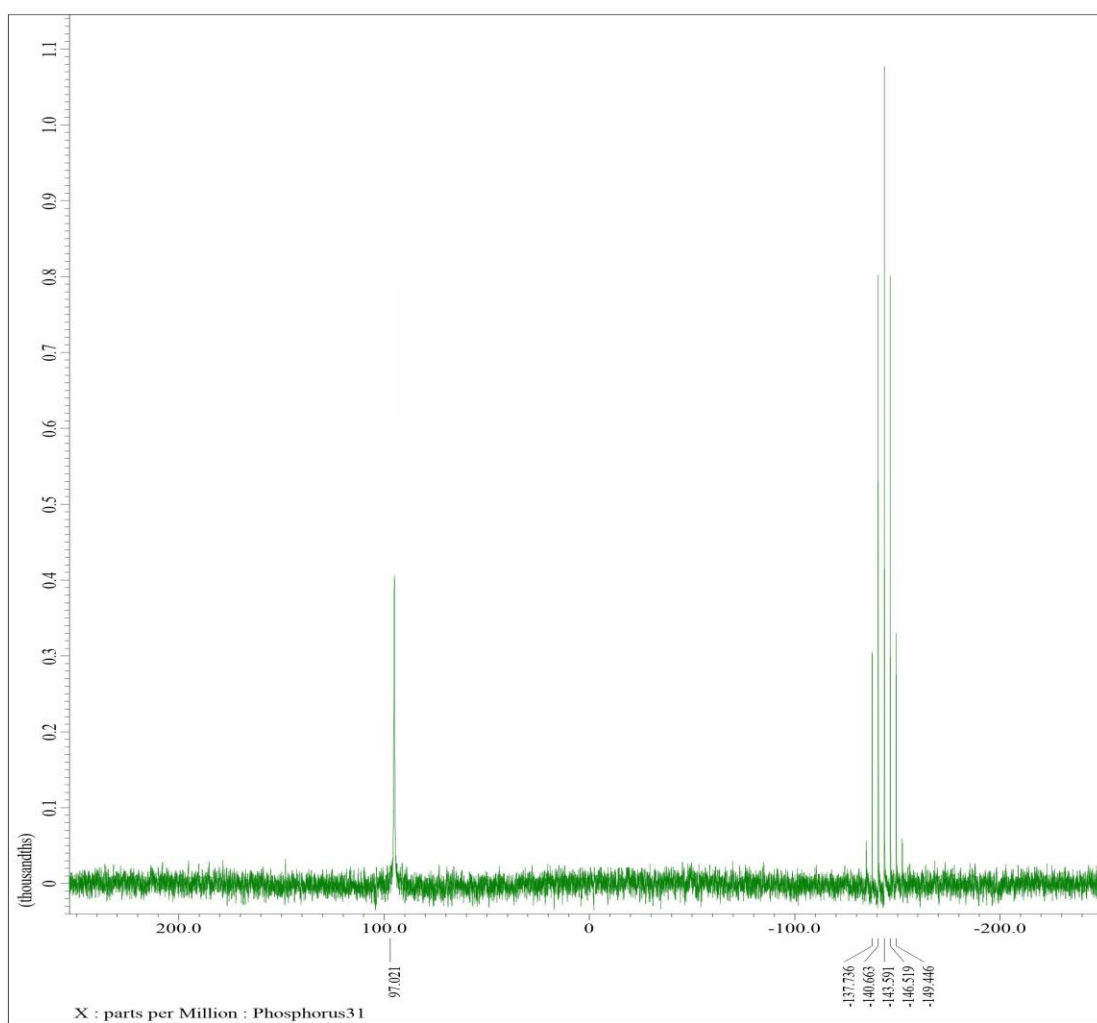

**Figure S16:** <sup>31</sup>P NMR spectrum of complex **3** in DMSO-d<sub>6</sub>

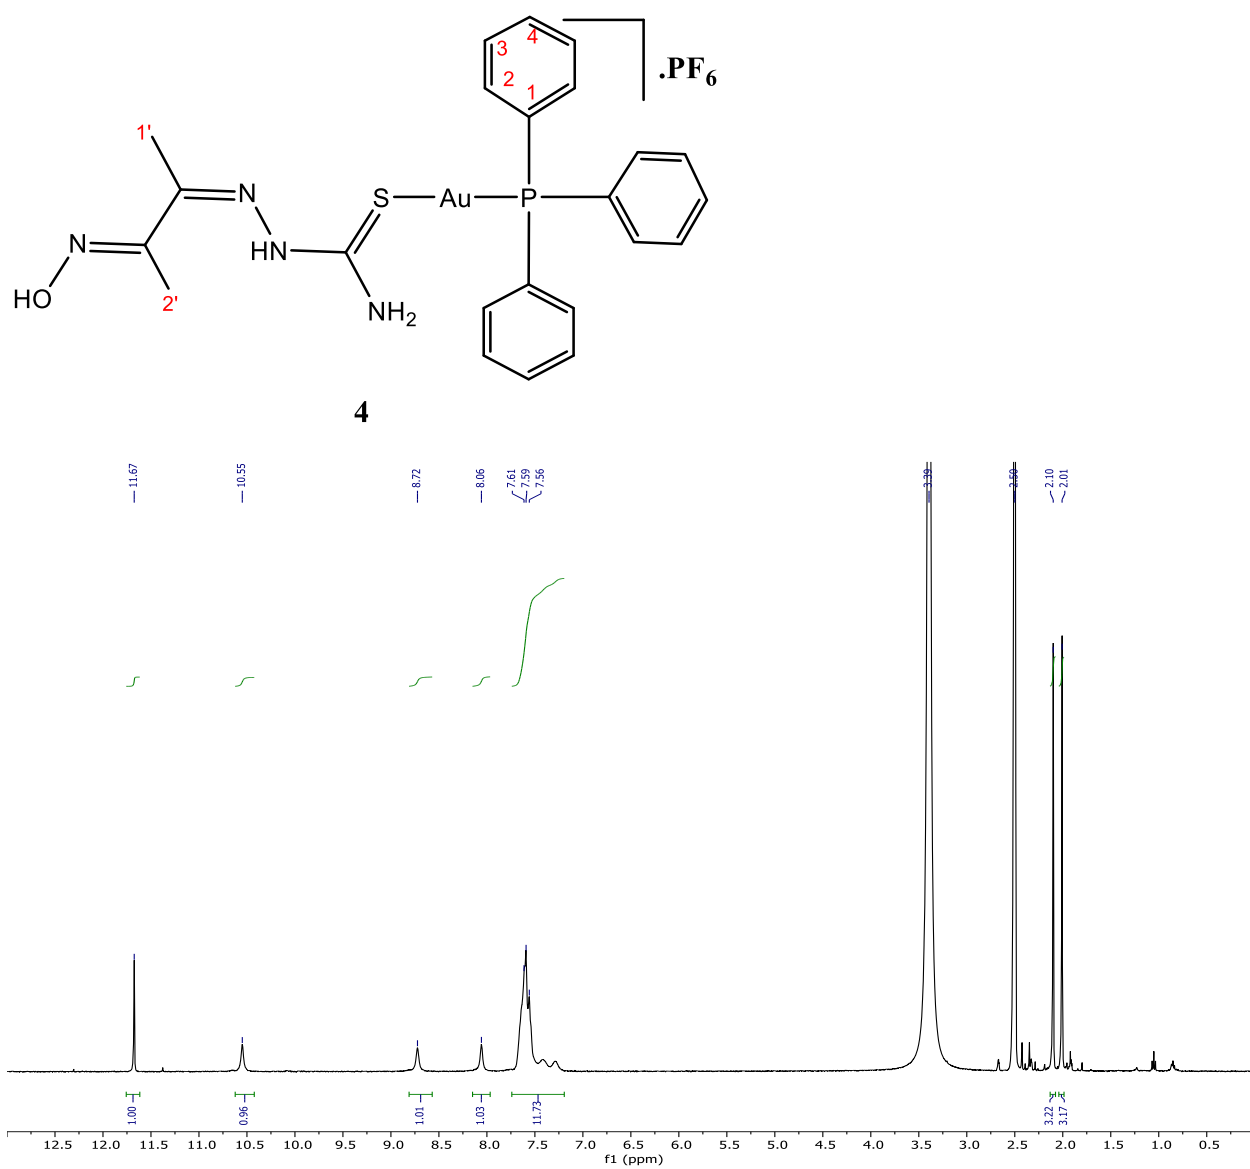

**Figure S17:** <sup>1</sup>H NMR spectrum of Complex 4 in DMSO-d<sub>6</sub>.

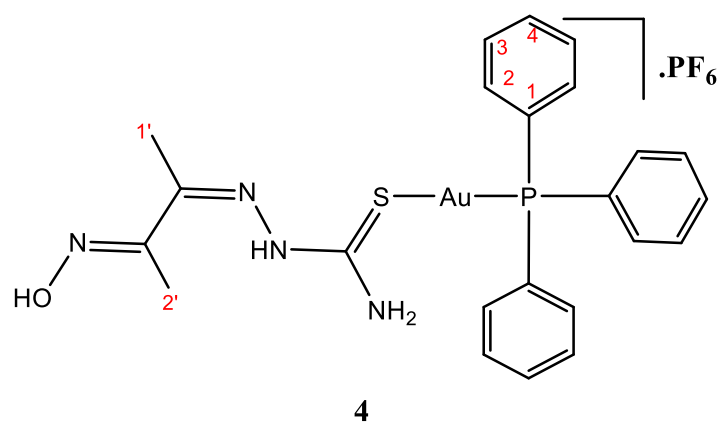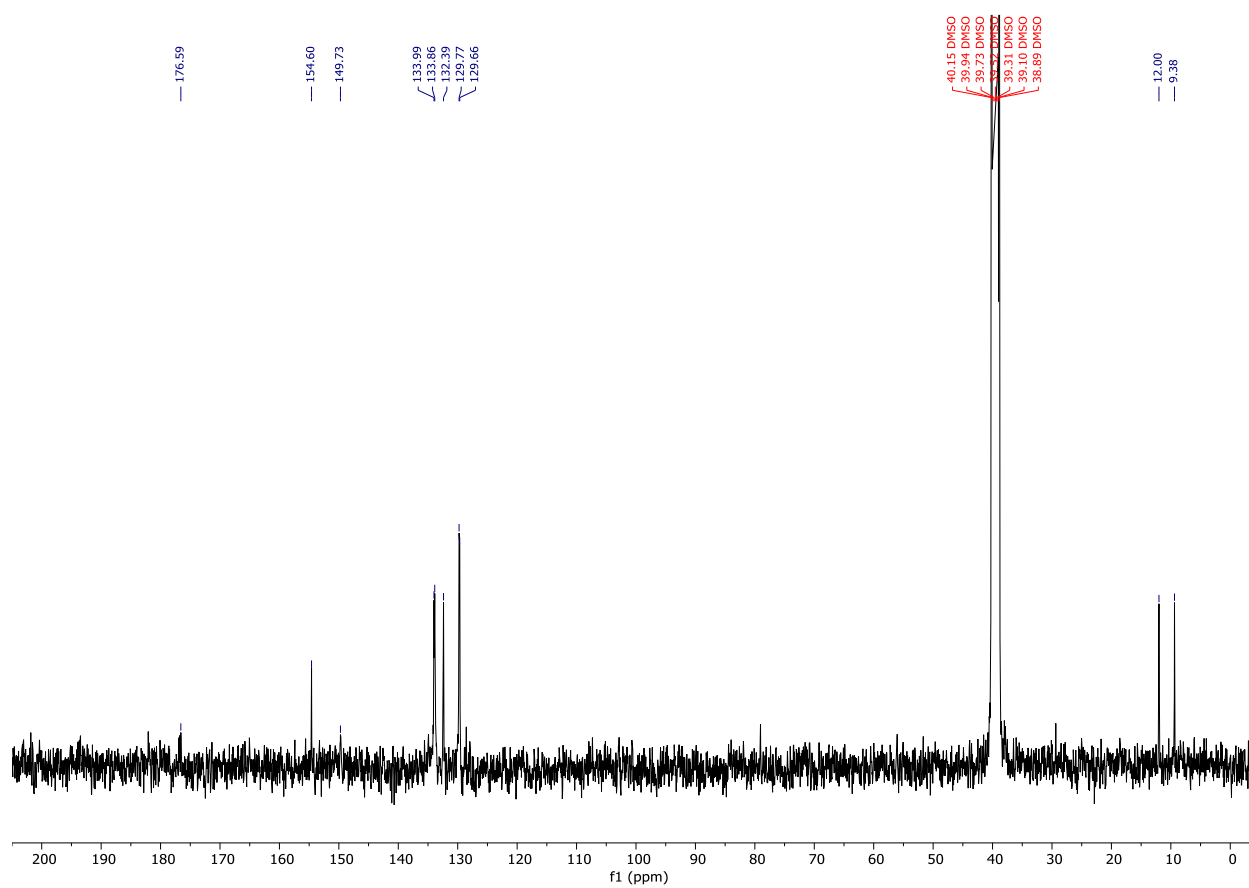

**Figure S18:**  $^{13}\text{C}$  NMR spectrum of Complex 4 in DMSO- $d_6$ .



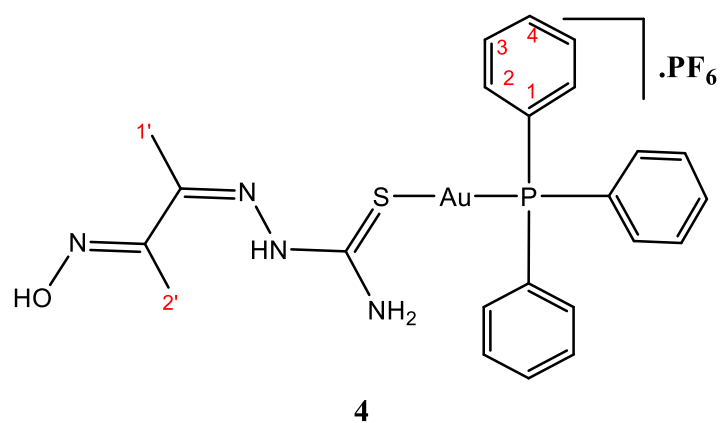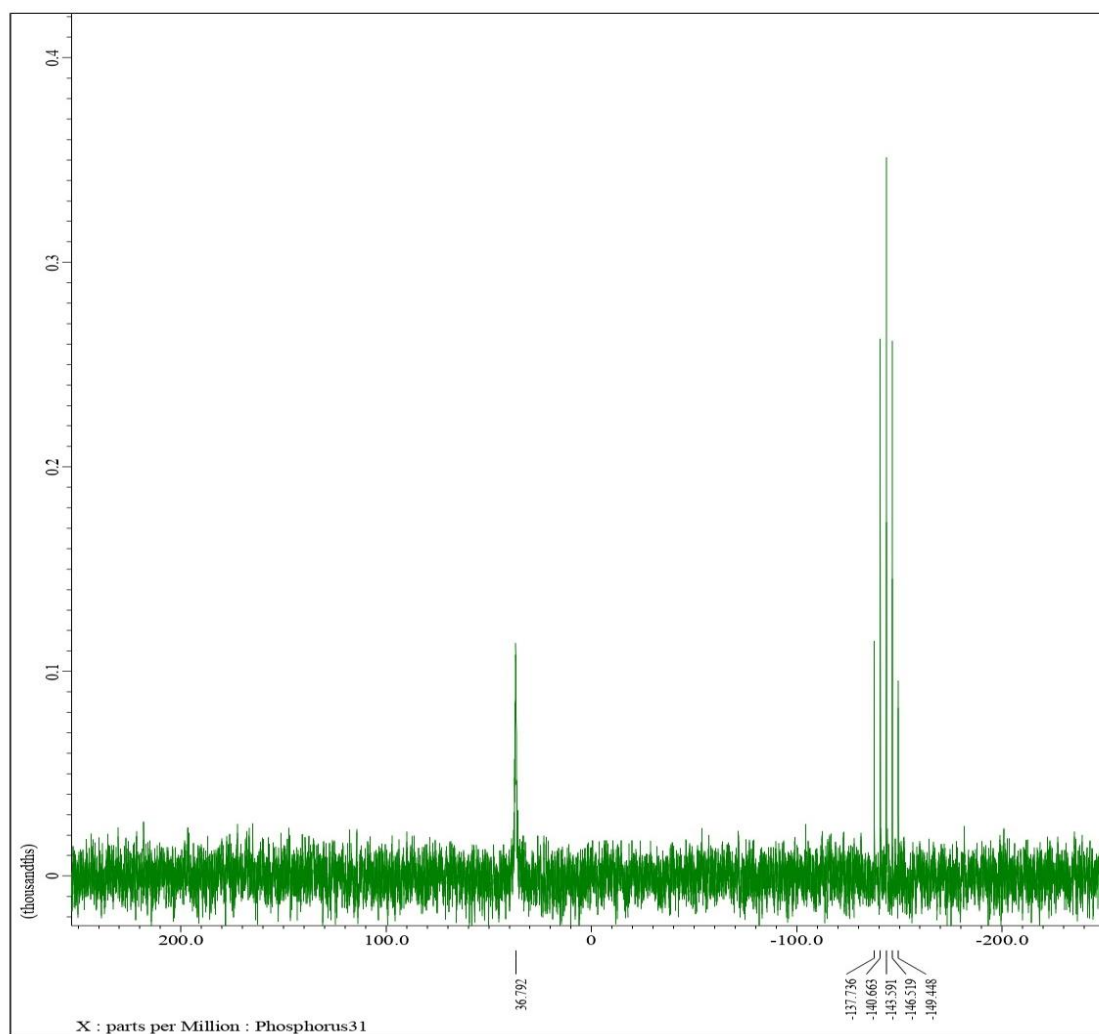

**Figure S19:**  $^{31}\text{P}$  NMR spectrum of complex **4** in  $\text{DMSO-d}_6$

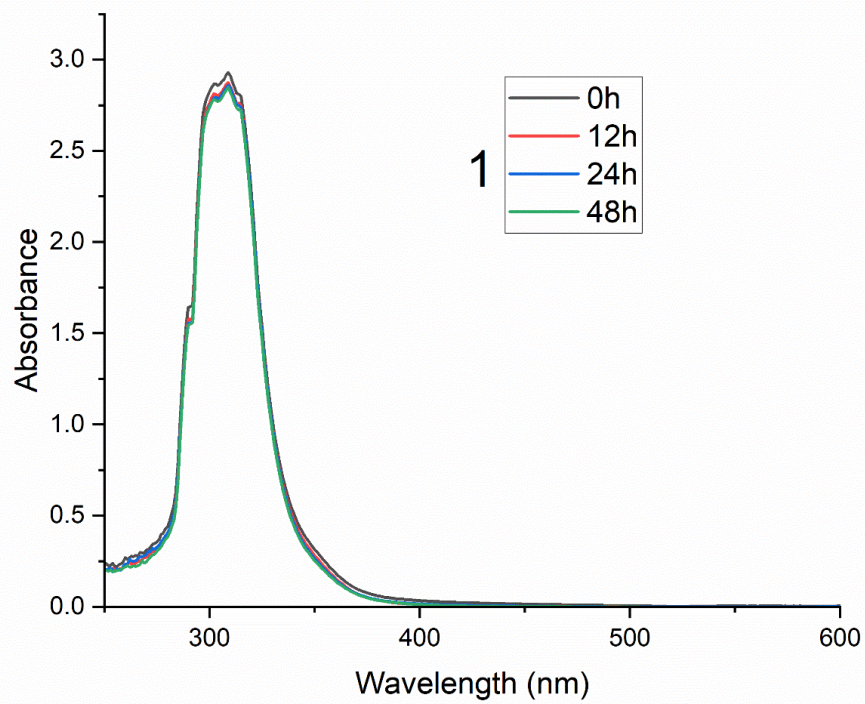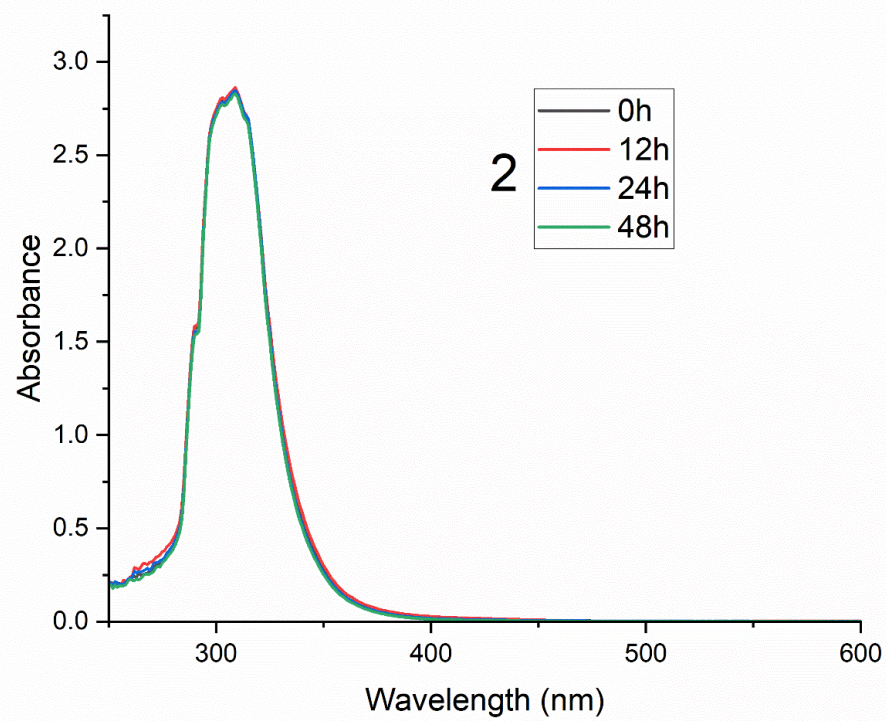

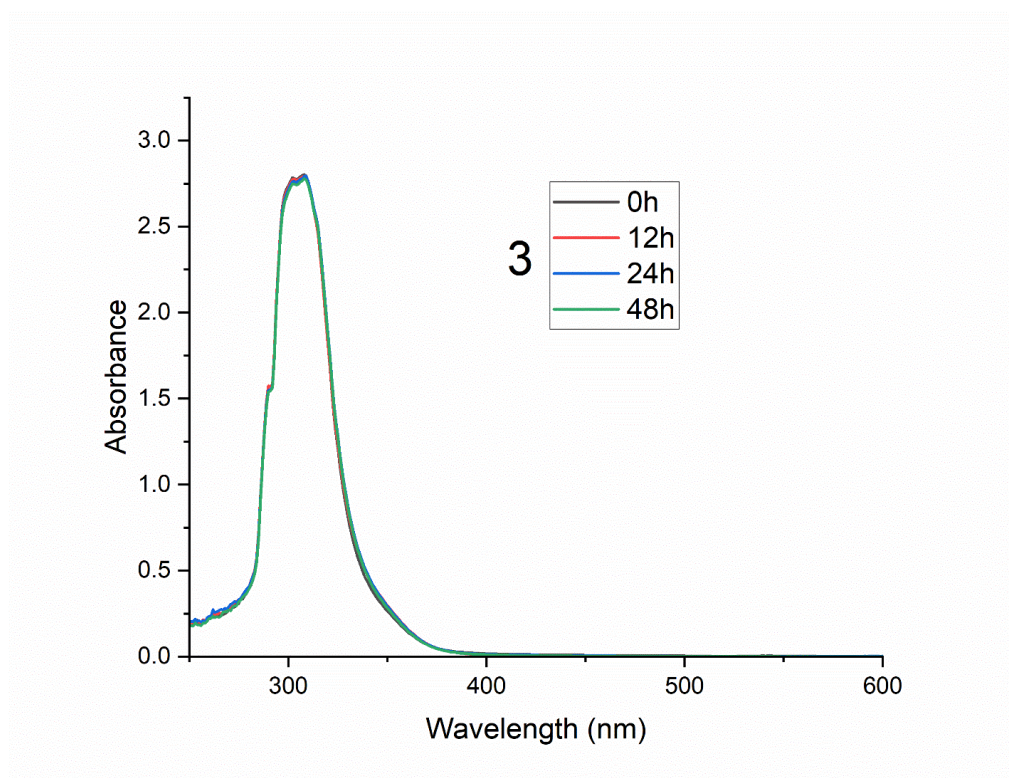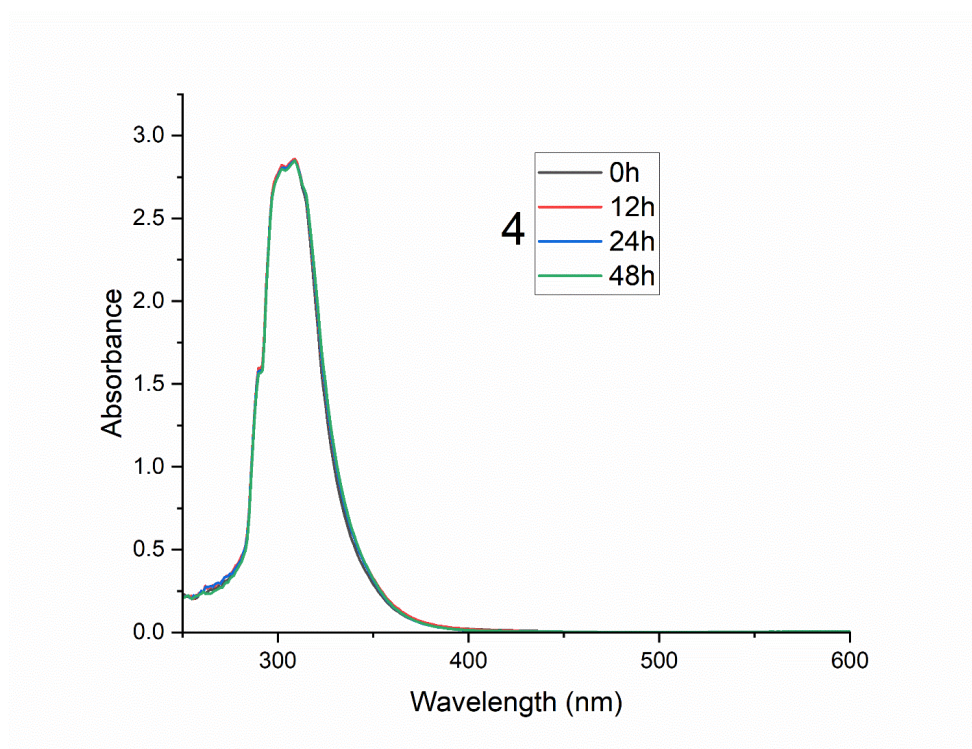

**Figures S20: UV-Vis spectra of (0.25 mM, 10 mL) complexes stability (1-4) at the different timing in the solution of DMSO.**



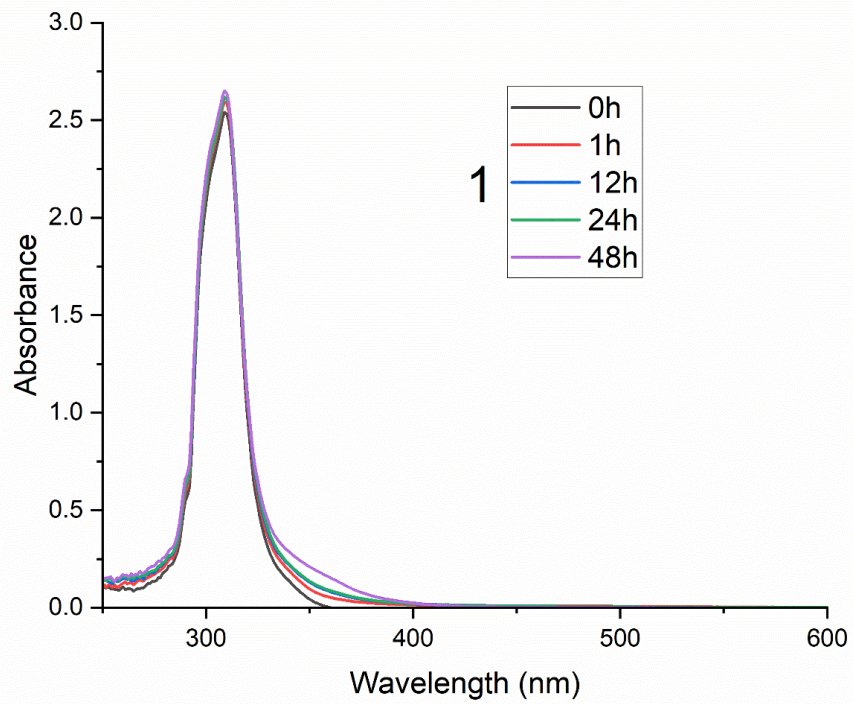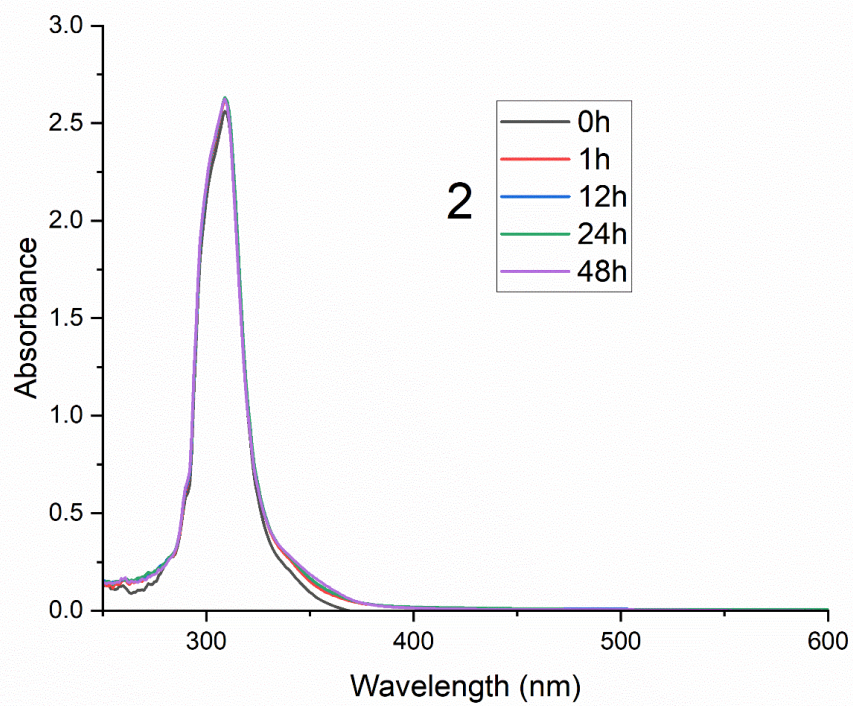

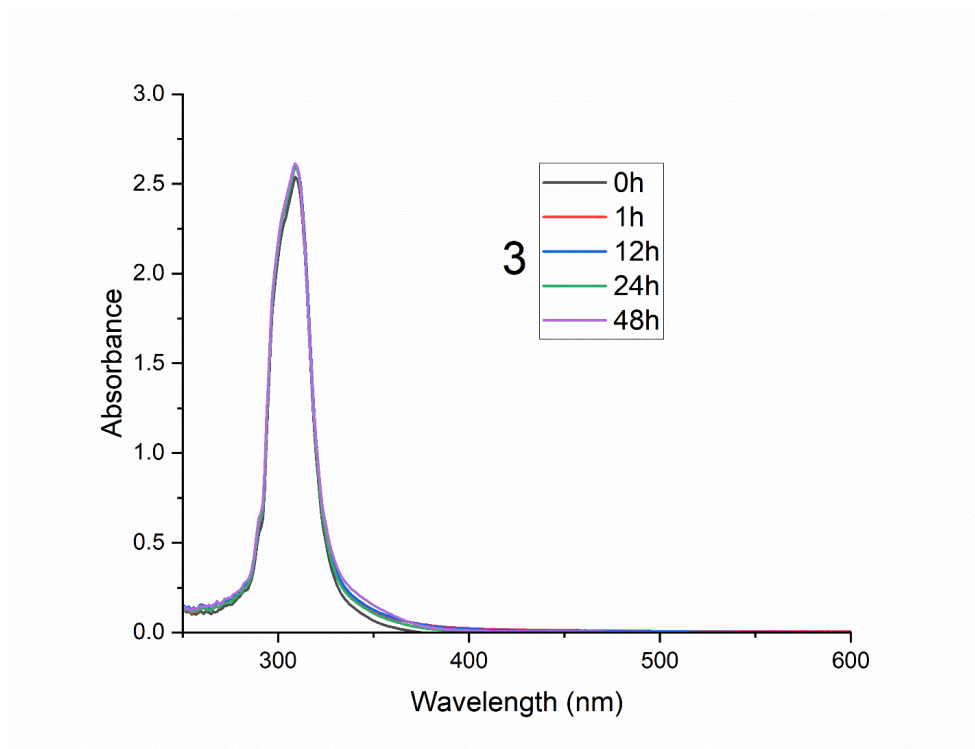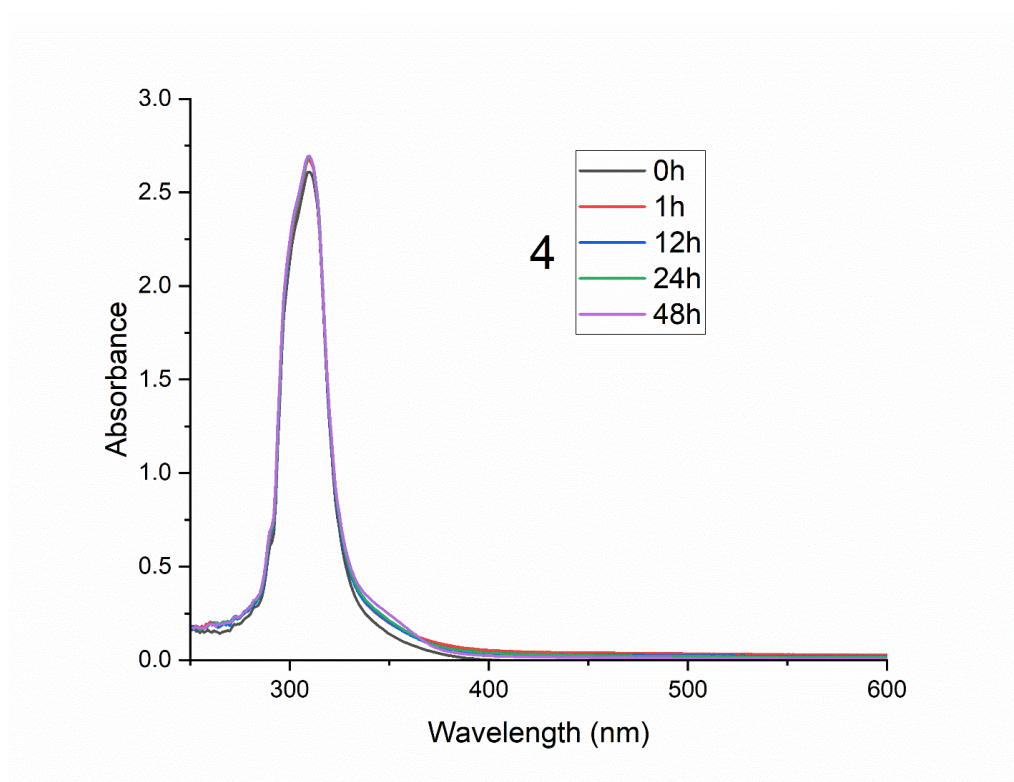

**Figures S21: UV-Vis spectra of (0.25 mM, 10 mL) complexes stability (1-4) at the different timing in the solution of EtOH:H<sub>2</sub>O (1:1).**
